# Supplementary material
Source: ML conference proceedings conference paper supplement (https://openreview.net/forum?id=RoN6NnHjn4)
Supplement: supplementary_material [file attachment]

---

# VEC2FACE: SCALING FACE DATASET GENERATION WITH LOOSELY CONSTRAINED VECTORS

Anonymous authors

Paper under double-blind review

## A APPENDIX

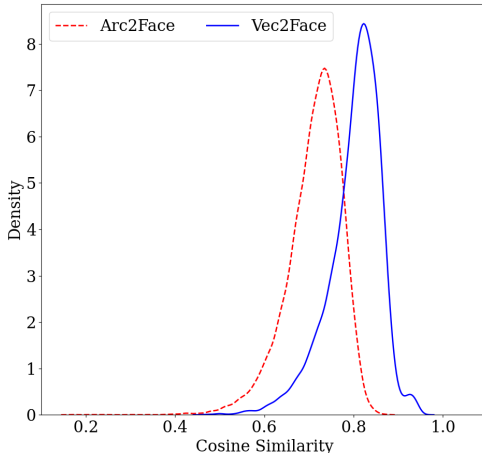

Figure 1: Similarity measurement between original and reconstructed in-the-wild images (LFW (Huang et al., 2008)).

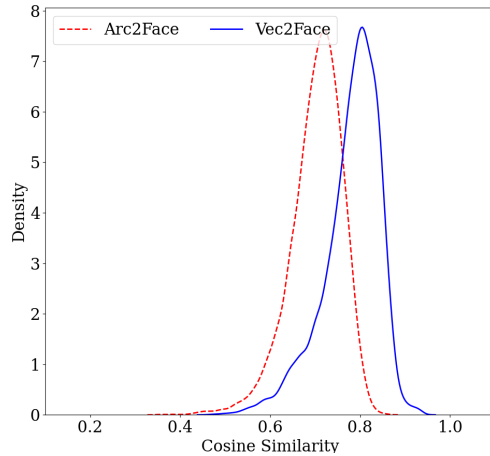

Figure 2: Similarity measurement between original and reconstructed Hadrian images (Wu et al., 2024).

### A.1 COMPARISON WITH DIFFUSION MODEL

Training a diffusion model conditioned with image feature vectors is a similar approach to Vec2Face. Thus, we evaluate both architectures by measuring the performance on open-set image reconstruction. For model choice, Arc2Face (Papantoniou et al., 2024) model, which fine-tunes the stable-diffusion-v1-5 on WebFace42M, is used to represent the diffusion models. For test set choices, the images in an in-the-wild dataset, LFW (Huang et al., 2008), and an indoor dataset, Hadrian (Wu et al., 2024) are used. Since both model use face feature as input, we extract image features by using a FR model and feed to both models for image reconstruction. **Because both dataset are trained/fine-tuned on the cropped and aligned FR datasets, no image cropping and alignment are used in this evaluation.** Fig. 1 and Fig. 2 show the similarity distribution between the original images and reconstructed images. The observations are: 1) both models can preserve the identity for the in-door images, 2) Vec2Face has better performance on open-set image reconstruction on both datasets, 3) the diffusion model conditioned with image/identity features do not always preserve the identity, especially for in-the-wild images. Since both model use the features of the same set of images and the variation of the images generated by Arc2Face are only dependent on the initial noise image, we speculate the failed cases of identity preservation are caused by the initial noise image. Hence, the proposed architecture is better than the conventional diffusion model conditioned with image features on identity preservation. Examples are shown in Fig. 11.

### A.2 ABLATION STUDY OF LOSS FUNCTIONS

This section presents the effects of identity loss  $L_{id}$ , perceptual loss,  $L_{lips}$  and GAN loss  $L_{GAN}$  on image reconstruction. The observations in Fig. 3 are: 1) without perceptual loss, the reconstructed

054  
055  
056  
057  
058  
059  
060  
061  
062  
063  
064  
065  
066  
067  
068

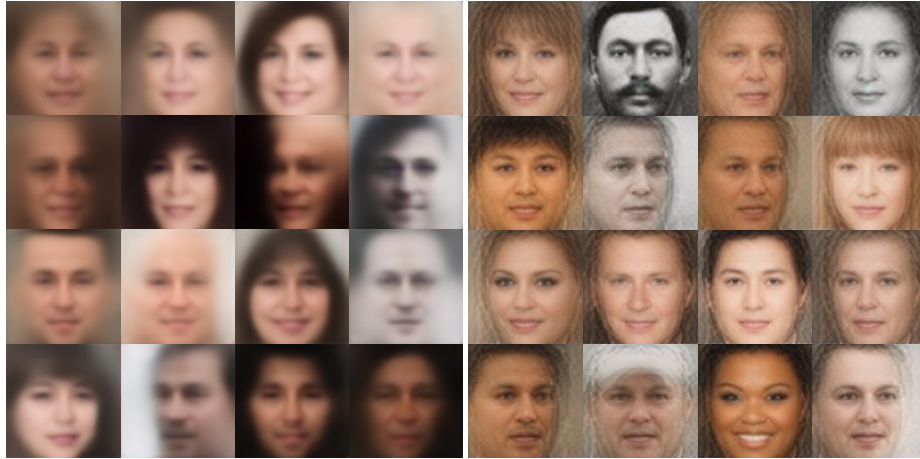

Effect of perceptual loss at epoch 138

069  
070  
071  
072  
073  
074  
075  
076  
077  
078  
079  
080  
081  
082  
083  
084

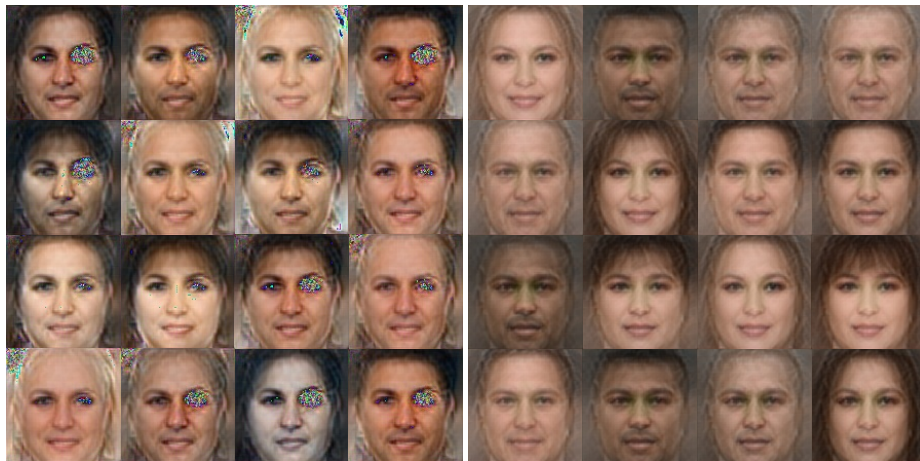

Effect of GAN loss at epoch 34

085  
086  
087  
088  
089  
090  
091  
092  
093  
094  
095  
096  
097  
098  
099

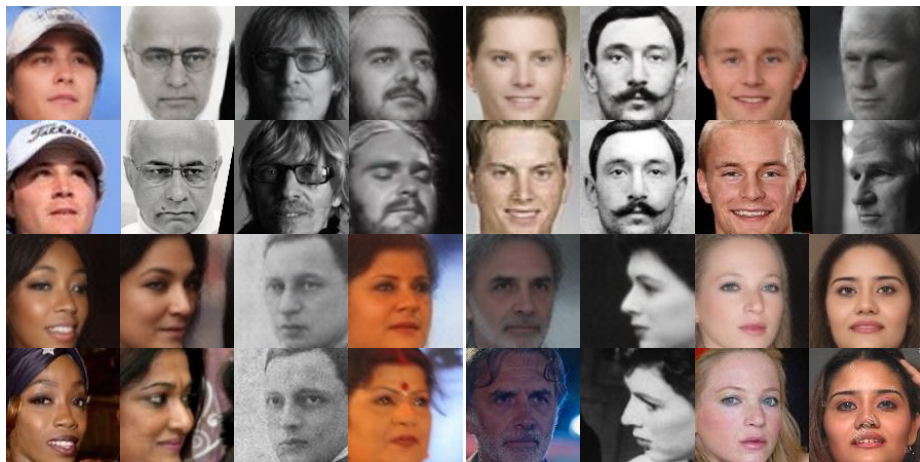

Effect of identity loss

101  
102  
103  
104  
105  
106  
107

Figure 3: Examples of loss effect during training. The reconstructed examples with corresponding loss involved are on the left, otherwise on the right. For identity loss, odd rows are reconstructed images and even rows are original images.

face edges are smoothed, 2) involving GAN loss at an early training stage causes a glitch effect on image reconstruction, 3) without identity loss, Vec2Face performs well on near-frontal images but not on images with large pose variations.

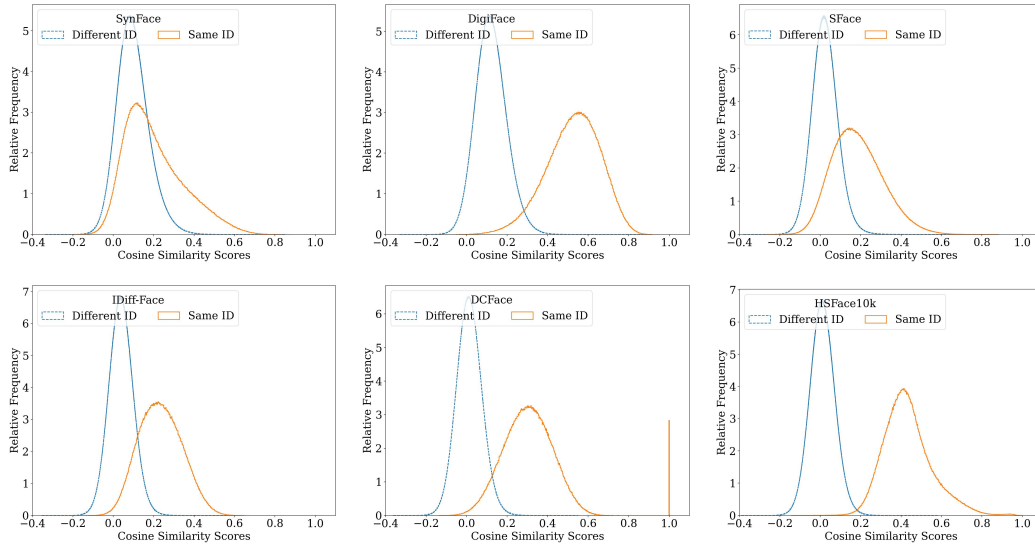

Figure 4: Similarity distributions of available synthetic datasets (Qiu et al., 2021; Boutros et al., 2022; Bae et al., 2023; Boutros et al., 2023; Kim et al., 2023) and ours. The results indicate that our dataset has the largest separability and smallest overlap / Equal Error Rate between genuine (**same ID**) and impostor (**different ID**) pairs.

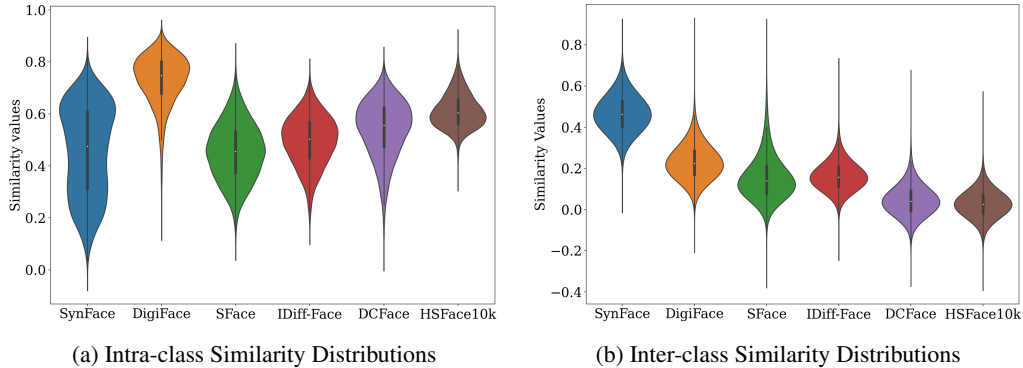

Figure 5: The inter-class and intra-class similarity distributions of the available synthetic datasets (Qiu et al., 2021; Boutros et al., 2023; Bae et al., 2023; Kim et al., 2023; Boutros et al., 2022) and ours.

### A.3 SYNTHETIC FR DATASET NOISE ANALYSIS

Dataset noise could be categorized as: i) images from different identities are in the same identity folder, and ii) images from the same identity are in different identity folders. For synthetic datasets, there is no ground truth for identities, so we used the labels provided by the corresponding work.

Following the metric used in previous works (Cao et al., 2018; Wu & Bowyer, 2023; Zhu et al., 2023; Deng et al., 2022), we evaluate the dataset noise using two hard threshold values: one for detecting the outliers within each folder (intra-class noise), and another for detecting similar identities but marked as different in the dataset (inter-class noise). Figure 5a shows the cosine similarity distributions of the available synthetic datasets in situation one. Since greater similarity means images are more likely from the same identity, the results show that our dataset has the highest identity consistency within each identity folder. Moreover, if the similarity value of an image feature and its identity feature is less than 0.3, it can be regarded as an outlier/noise (Deng et al., 2022). With this metric, the available synthetic datasets contain greater intra-class noise than ours. Figure 5b shows the similarity distributions of available synthetic datasets in situation two. WebFace260M (Zhu et al., 2023) is the only work discussing the details of inter-class denoising. It merged two identity folders if their identities have higher than 0.7 similarity, so if the identity similarity is larger than 0.7, we regard it

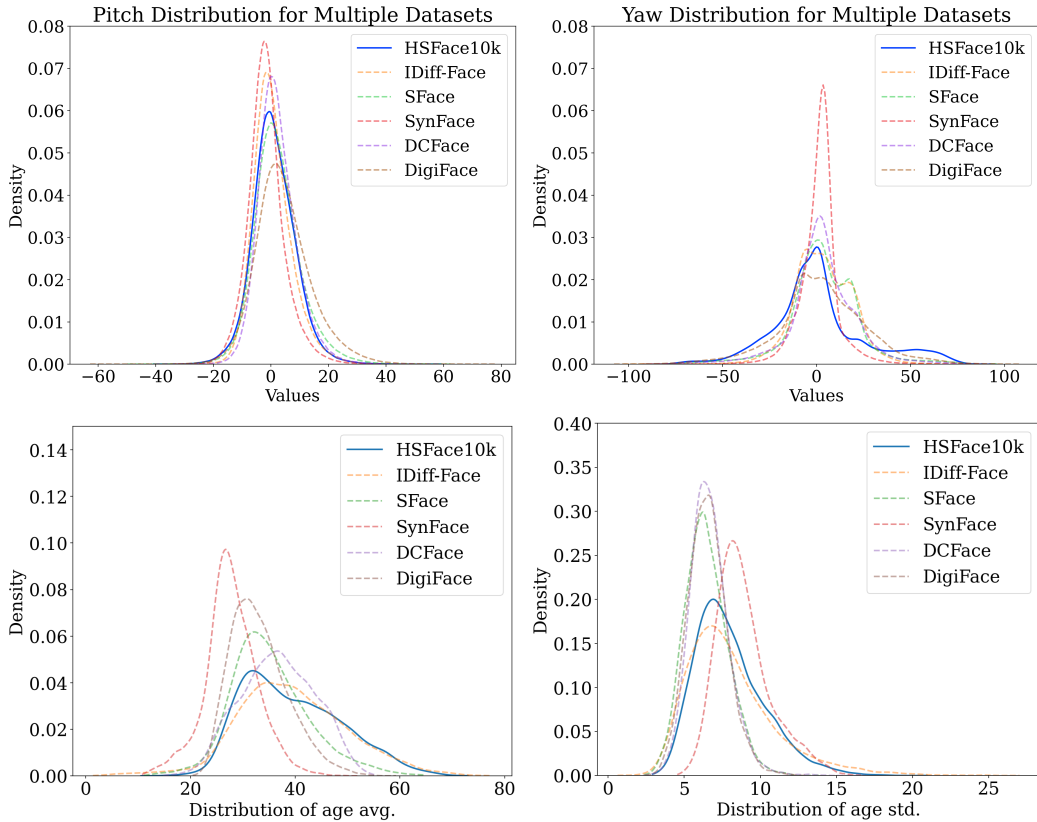

Figure 6: Pose and age variation across five test sets and HSFace10k (ours).

as an inter-class noise. The results show that, except for DCFace and ours, the other datasets have inter-class noise to some extent.

Generally, our proposed dataset has the lowest intra-class noise and inter-class noise. Moreover, Figure 4 shows that the proposed dataset has the lowest overlapped area / Equal Error Rate (EER), showing the best dataset quality on separability between genuine (same people) and impostor (different people) pairs. It promises more reliable identity labels for the FR algorithm to learn better representations.

#### A.4 THE EFFECT OF AGE AND POSE VARIATION OF DATASETS IN FR ACCURACY

To estimate the distribution of age and pose, we use `img2pose` (Albiero et al., 2021) and an age estimator (Albiero et al., 2020) to obtain the data. Fig. 6 shows the distributions of pose and age of five available synthetic datasets and HSFace10k. Since roll is controlled by face detectors, only pitch and yaw angles are estimated. The results show that all the datasets have large variations on both pose and age, suggesting the accuracy difference is not mainly caused by the attribute variation but by identity consistency. Having large variations but losing the identity consistency results in lower accuracy.

#### A.5 FEATURE INTERPOLATION AND FEATURE VALUE IMPACT ON GENERATED IMAGES

We analyze the impact of feature values on the generated images in two ways: 1) interpolating six feature vectors between two image features and 2) proportionally changing the values in the feature vector. Figure 7 shows the results of feature interpolation between two images. It indicates that the interpolation in the feature domain can be smoothly presented in the image domain, showcasing Vec2Face’s capability of understanding the vector characteristics in the feature domain. Figure 8 shows the results of proportionally changing the values in the feature. The observations are: 1) As the values in a feature vector increase to a large extent, the image stops changing but the quality



216  
217  
218  
219  
220  
221  
222  
223  
224  
225  
226  
227  
228  
229  
230  
231  
232  
233  
234  
235  
236  
237  
238  
239  
240  
241  
242  
243  
244  
245  
246  
247  
248  
249  
250  
251  
252  
253  
254  
255  
256  
257  
258  
259  
260  
261  
262  
263  
264  
265  
266  
267  
268  
269

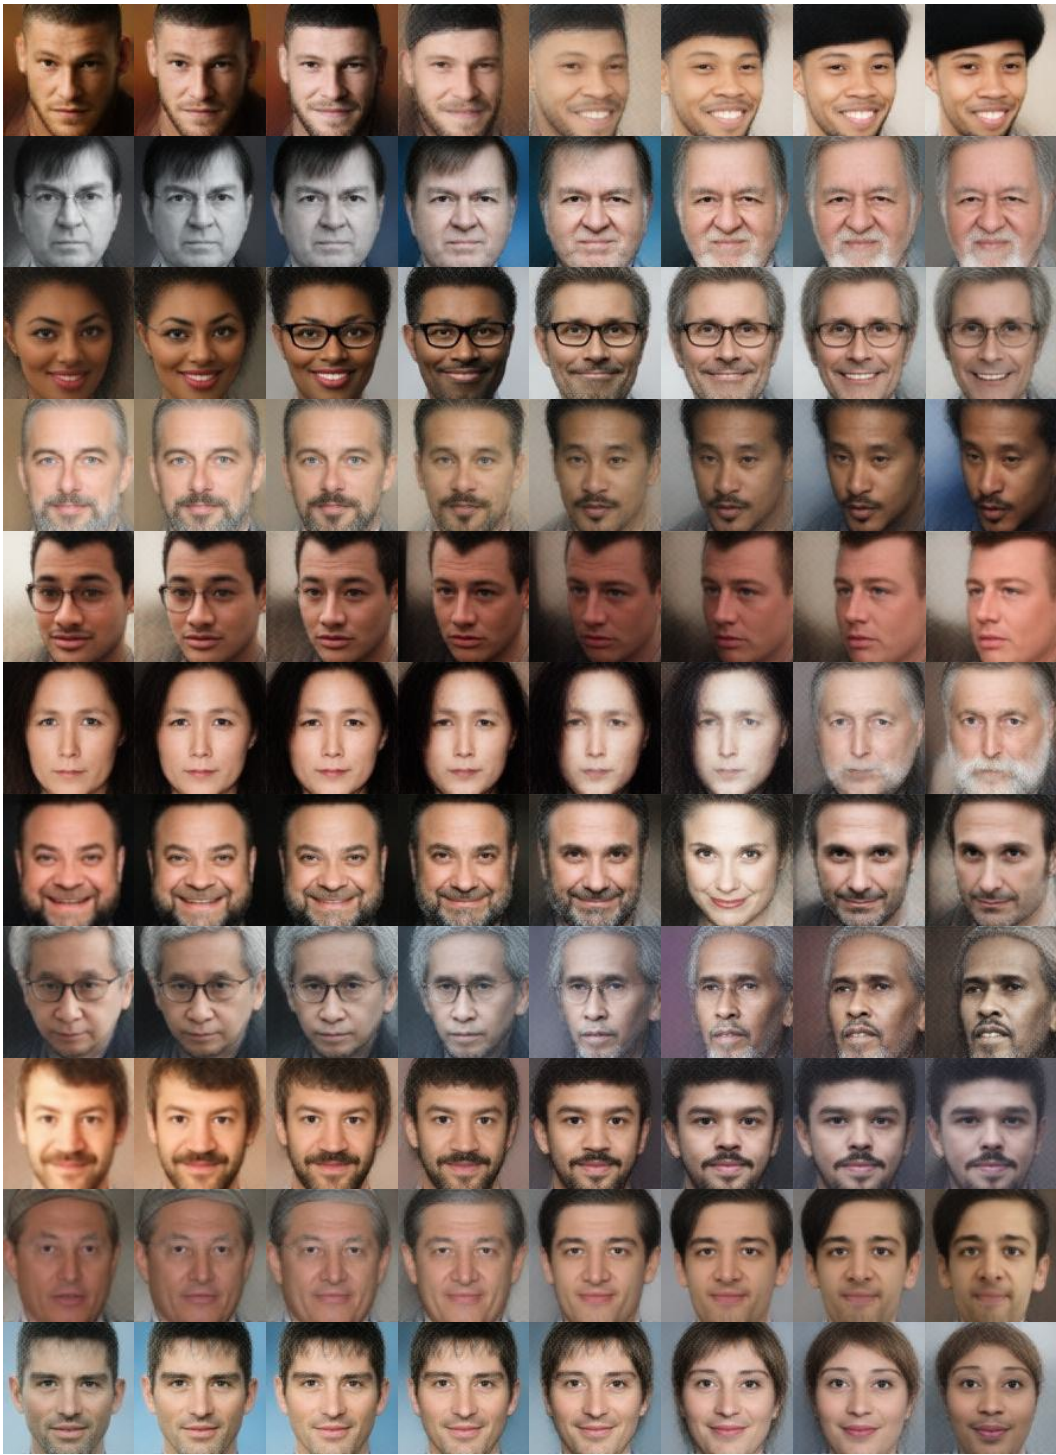

Figure 7: Feature interpolation results. These show that Vec2Face can smoothly convert one image to another by simply changing the feature values.

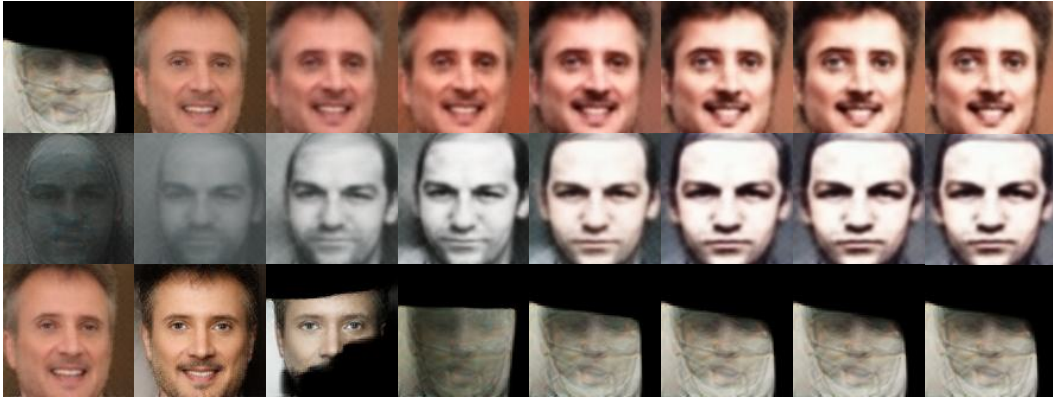

Figure 8: Impact of feature values analysis. The first row shows images generated with feature values, from left to right, of  $\{0, 1, 1.5, 2, 3, 10, 100, 200\}$ . The second row shows images generated with feature values of  $\{-0.5, -1, -1.5, -2, -3, -10, -100, -200\}$ . The last row shows images generated with feature values of  $\{1, 0.5, 0.25, 0.125, 0.0625, 0.03125, 0.015625, 0\}$ .

decreases, for both negative and positive directions; 2) As the values in a feature vector become close to zero, the face attributes are erased and eventually disappeared.

#### A.6 IMPACT OF VALUES AT DIMENSIONS

Vec2Face generates an image based on the values in a feature vector, which motivates an intriguing investigation of how values in dimensions impact the output image. We start at changing the value in one dimension. Fig. 13 shows the cases where some obvious patterns occurring. For each of the four identities, the value at index 15 is related to the hair volume, pose angle, age and expression; the value at index 26 have a high correlation with the bangs, facial hair and age, eyeglasses presence, and expression; increasing the value at index 32 changes the age, head pose, hair color, and expression. The observation is that changing values in a single dimension may change the face attribute but it is not consistent for all identities. In fact, changing value at a single dimension does a negligible change on the generated image in most dimensions.

We then change the values in fixed-length (*i.e.*, 8) of dimension chunks and there are some noticeable patterns. Fig. 12 shows the generated images when the values at specific dimensions increases. A general conclusion is that changing values at dimension chunks varies the facial attributes but the patterns are also inconsistent across identities. For instance, dimension  $[40:48]$  changes the age for the first identity, no obvious pattern for the second, the expression for the third, and head pose for the fourth; dimension  $[56:64]$  changes the hairstyle for the first identity, facial hair for the second, age and eyeglasses for the third, age and facial hair for the fourth; dimension  $[96:104]$  changes the gender for the first identity, age and hairstyle for the second, face exposure level for the third, and facial hair for the fourth. Therefore, it is hard to control the attributes by handcrafting the features. AttrOP is much more efficient and effective.

#### A.7 DISCUSSION OF PRIVACY ISSUE AND FUTURE DATASET USAGE

The privacy issue of using images from real identities is the main concern in face recognition technique development. As a result, governments publish regulations (Voigt & Von dem Bussche, 2017) to restrict the biometric data usage. Before the possible

| Datasets | HSFace300K | WebFace4M (50K) | Glint360K |
|----------|------------|-----------------|-----------|
| Accuracy | 93.52      | 96.61           | 97.63     |

Table 1: FR accuracy comparison of the model trained with the largest proposed data HSFace300K, the 50K identities used for Vec2Face training, and the pretrained FR model used for feature extraction.

fully restrictions on real face data usage, although no achieving as good performance as using datasets of real data (see in Table 1), this work provides several datasets for continuing the development of face recognition techniques without violating the regulations. Moreover, the unique design of Vec2Face can be inspired for generating better synthetic datasets in the future.

324  
325  
326  
327  
328  
329  
330  
331  
332  
333  
334  
335  
336  
337  
338  
339  
340  
341  
342  
343  
344  
345  
346  
347  
348  
349  
350  
351  
352  
353  
354  
355  
356  
357  
358  
359  
360  
361  
362  
363  
364  
365  
366  
367  
368  
369  
370  
371  
372  
373  
374  
375  
376  
377

A.8 OTHER MATERIAL

The architecture of fMAE is in 10. The FR training configuration is in Table 2. The examples of the effect of stochasticity in fMAE on generated images is in Figure 9.

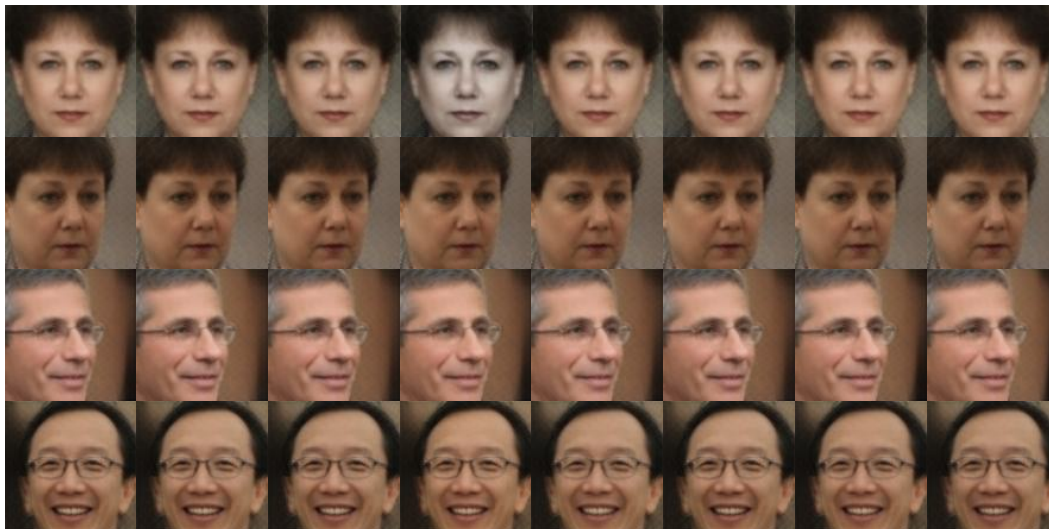

Figure 9: Examples of the effect of the stochasticity of fMAE. Each vectors is processed 8 times for image generation. The changes on images are negligible.

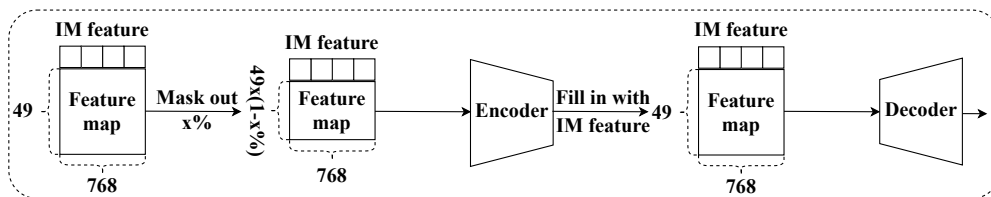

Figure 10: Architecture of the proposed feature masked autoencoder (fMAE).

| Face Recognition Model Training Configurations |                              |
|------------------------------------------------|------------------------------|
| Head                                           | ArcFace                      |
| Backbone                                       | SE-IR50                      |
| Input Size                                     | 112×112                      |
| Batch Size                                     | 128                          |
| Learning Rate                                  | 0.1                          |
| Weight Decay                                   | 5e-4                         |
| Momentum                                       | 0.9                          |
| Epochs                                         | 26                           |
| Margin                                         | 0.5                          |
| FP16                                           | True                         |
| Sample Rate                                    | 1.0                          |
| Reduce Learning Rate                           | [12, 20, 24]                 |
| Augmentation                                   | Random aug. and Random erase |
| Optimizer                                      | SGD                          |
| Workers                                        | 2                            |
| GPU                                            | RTX6000                      |

Table 2: Configurations used for synthetic dataset training.



378  
379  
380  
381  
382  
383  
384  
385  
386  
387  
388  
389  
390  
391  
392  
393  
394  
395  
396  
397  
398  
399  
400  
401  
402  
403  
404  
405  
406  
407  
408  
409  
410  
411  
412  
413  
414  
415  
416  
417  
418  
419  
420  
421  
422  
423  
424  
425  
426  
427  
428  
429  
430  
431

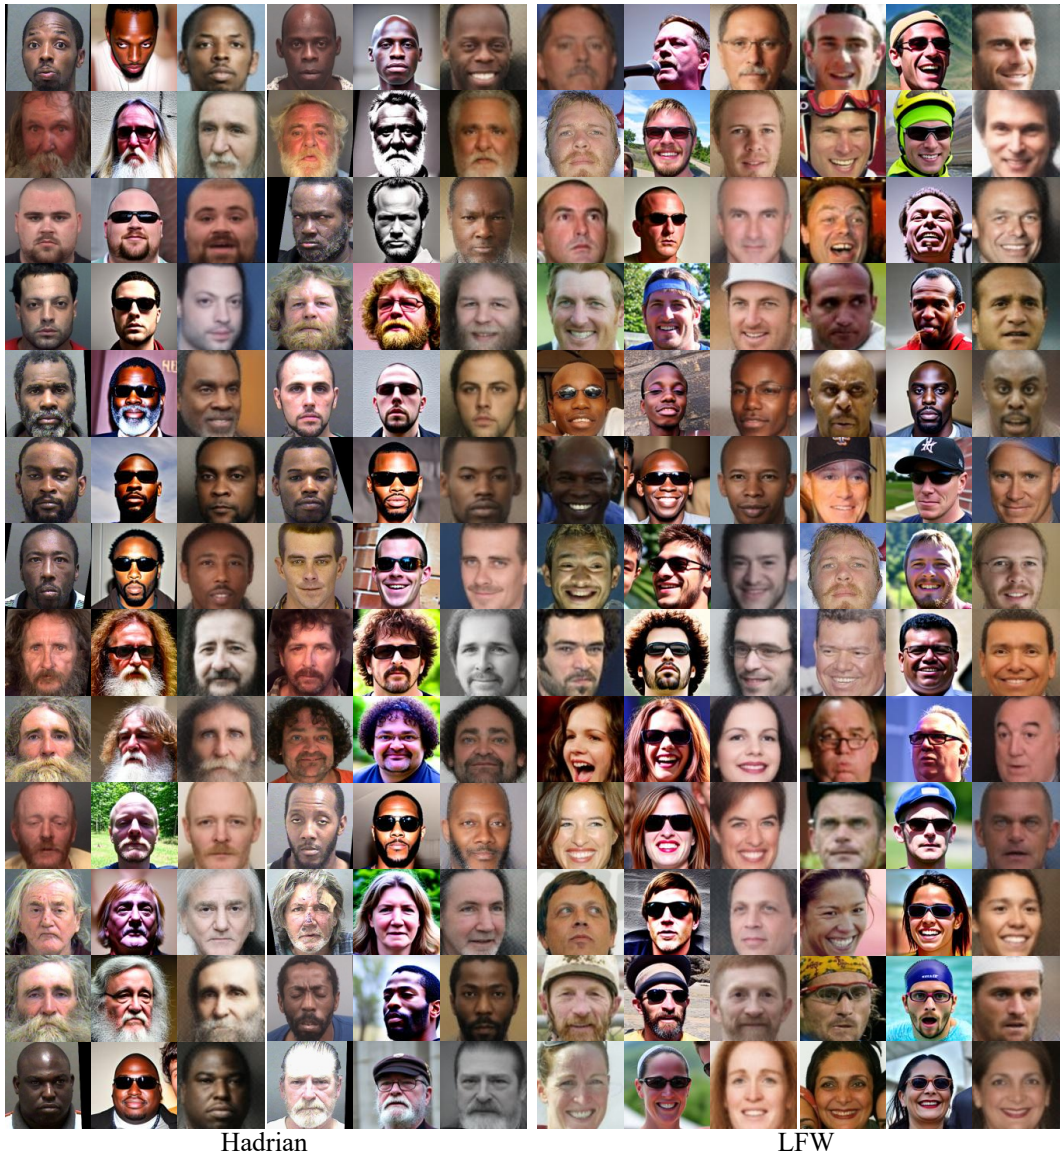

Figure 11: Examples of reconstructed Hadrian and LFW images by Arc2Face and Vec2Face. The images in each three-image group, from left to right, are the original, from Arc2Face, and from Vec2Face.



432  
433  
434  
435  
436  
437  
438  
439  
440  
441  
442  
443  
444  
445  
446  
447  
448  
449  
450  
451  
452  
453  
454  
455  
456  
457  
458  
459  
460  
461  
462  
463  
464  
465  
466  
467  
468  
469  
470  
471  
472  
473  
474  
475  
476  
477  
478  
479  
480  
481  
482  
483  
484  
485

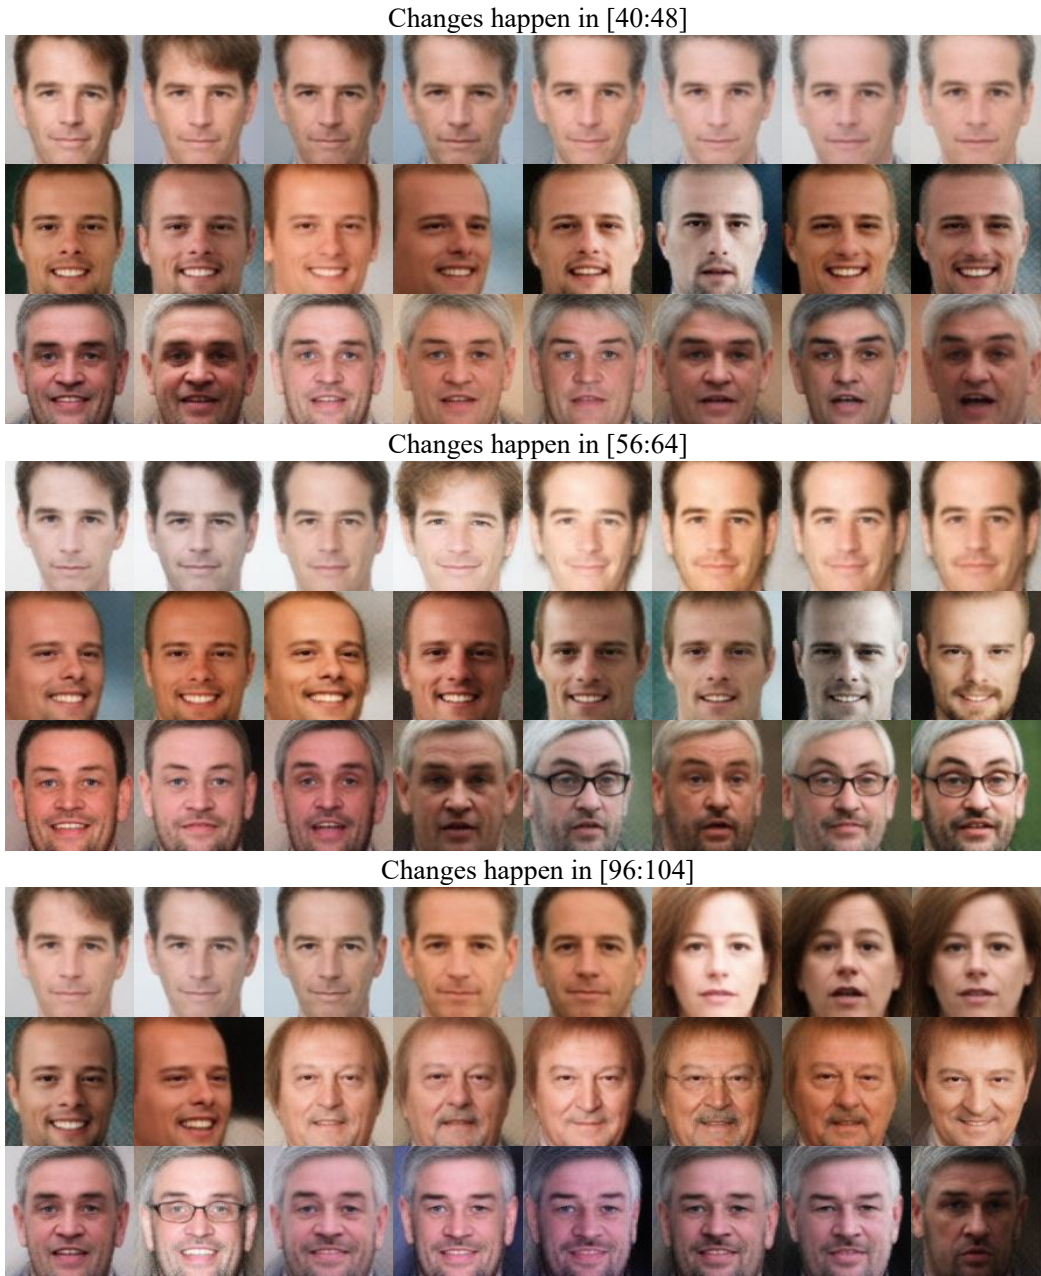

Figure 12: Examples of changing values in a single dimension. From left to right, the value gradually increases in the target dimensions. The raw images are in low quality, so we use AttrOP to increase the image quality.

486  
487  
488  
489  
490  
491  
492  
493  
494  
495  
496  
497  
498  
499  
500  
501  
502  
503  
504  
505  
506  
507  
508  
509  
510  
511  
512  
513  
514  
515  
516  
517  
518  
519  
520  
521  
522  
523  
524  
525  
526  
527  
528  
529  
530  
531  
532  
533  
534  
535  
536  
537  
538  
539

Changes happen in [15]

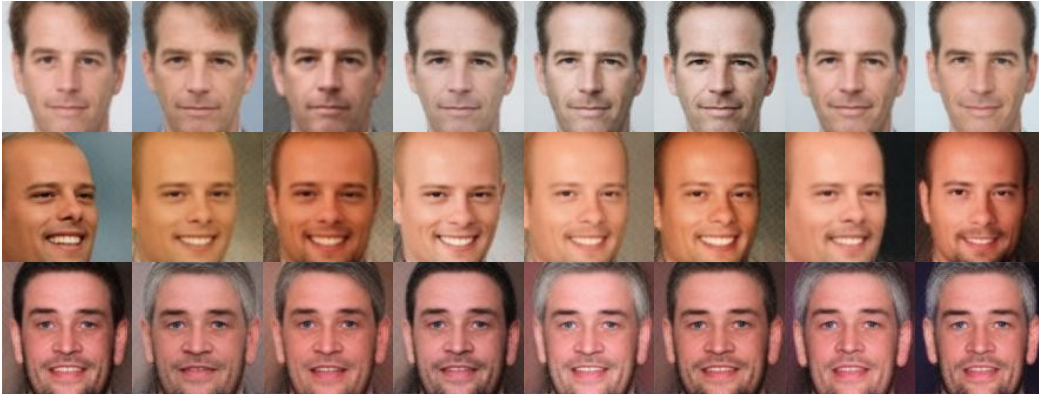

Changes happen in [26]

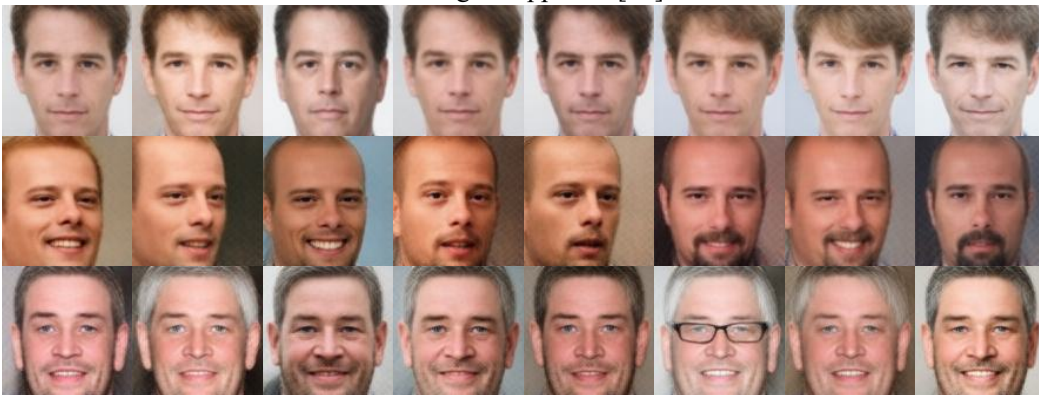

Changes happen in [32]

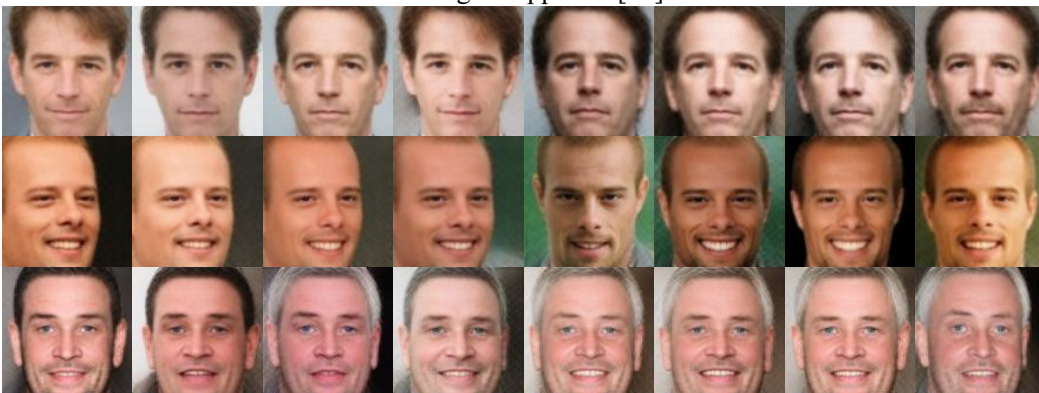

Figure 13: Examples of changing values in a single dimension. From left to right, the value gradually increases in the target dimensions. The raw images are in low quality, so we use AttrOP to increase the image quality.

540  
541  
542  
543  
544  
545  
546  
547  
548  
549  
550  
551  
552  
553  
554  
555  
556  
557  
558  
559  
560  
561  
562  
563  
564  
565  
566  
567  
568  
569  
570  
571  
572  
573  
574  
575  
576  
577  
578  
579  
580  
581  
582  
583  
584  
585  
586  
587  
588  
589  
590  
591  
592  
593

---

## REFERENCES

- Vítor Albiero, Kai Zhang, and Kevin W Bowyer. How does gender balance in training data affect face recognition accuracy? In *IJCB*, pp. 1–10. IEEE, 2020.
- Vitor Albiero, Xingyu Chen, Xi Yin, Guan Pang, and Tal Hassner. img2pose: Face alignment and detection via 6dof, face pose estimation. In *CVPR*, pp. 7617–7627, 2021.
- Gwangbin Bae, Martin de La Gorce, Tadas Baltrusaitis, Charlie Hewitt, Dong Chen, Julien P. C. Valentin, Roberto Cipolla, and Jingjing Shen. Digiface-1m: 1 million digital face images for face recognition. In *WACV*, pp. 3515–3524, 2023.
- Fadi Boutros, Marco Huber, Patrick Siebke, Tim Rieber, and Naser Damer. Sface: Privacy-friendly and accurate face recognition using synthetic data. In *IJCB*, pp. 1–11. IEEE, 2022.
- Fadi Boutros, Jonas Henry Grebe, Arjan Kuijper, and Naser Damer. Idiff-face: Synthetic-based face recognition through fuzzy identity-conditioned diffusion model. In *ICCV*, pp. 19650–19661, 2023.
- Qiong Cao, Li Shen, Weidi Xie, Omkar M. Parkhi, and Andrew Zisserman. Vggface2: A dataset for recognising faces across pose and age. In *IEEE F&G*, pp. 67–74, 2018.
- Jiankang Deng, Jia Guo, Jing Yang, Niannan Xue, Irene Kotsia, and Stefanos Zafeiriou. Arcface: Additive angular margin loss for deep face recognition. *TPAMI*, 44, 2022.
- Gary B Huang, Marwan Mattar, Tamara Berg, and Eric Learned-Miller. Labeled faces in the wild: A database for studying face recognition in unconstrained environments. In *Workshop on faces in 'Real-Life' Images: detection, alignment, and recognition*, 2008.
- Minchul Kim, Feng Liu, Anil K. Jain, and Xiaoming Liu. Dcfac: Synthetic face generation with dual condition diffusion model. In *CVPR*, pp. 12715–12725. IEEE, 2023.
- Foivos Paraperas Papantoniou, Alexandros Lattas, Stylianos Moschoglou, Jiankang Deng, Bernhard Kainz, and Stefanos Zafeiriou. Arc2face: A foundation model of human faces. *arXiv preprint arXiv:2403.11641*, 2024.
- Haibo Qiu, Baosheng Yu, Dihong Gong, Zhifeng Li, Wei Liu, and Dacheng Tao. Synface: Face recognition with synthetic data. In *ICCV*, pp. 10860–10870, 2021.
- Paul Voigt and Axel Von dem Bussche. The eu general data protection regulation (gdpr). *A Practical Guide, 1st Ed.*, Cham: Springer International Publishing, pp. 10–5555, 2017.
- Haiyu Wu and Kevin W Bowyer. What should be balanced in a balanced face recognition dataset. In *BMVC*, pp. 2, 2023.
- Haiyu Wu, Sicong Tian, Aman Bhatta, Jacob Gutierrez, Grace Bezold, Genesis Argueta, Karl Ricanek Jr., Michael C. King, and Kevin W. Bowyer. What is a goldilocks face verification test? *arXiv preprint arXiv:2405.15965*, 2024.
- Zheng Zhu, Guan Huang, Jiankang Deng, Yun Ye, Junjie Huang, Xinze Chen, Jiagang Zhu, Tian Yang, Dalong Du, Jiwen Lu, and Jie Zhou. Webface260m: A benchmark for million-scale deep face recognition. *TPAMI*, pp. 2627–2644, 2023.
